# Supplementary material for: Neuroprotective mechanism of low-dose sodium nitrite in oxygen-glucose deprivation model of cerebral ischemic stroke in PC12 cells
Source: PubMed Central journal article supplement (PMC6558507; doi:10.17179/excli2018-1947), 2019-04-08
Supplement: EXCLI-18-229-s-001.pdf [file EXCLI-18-229-s-001.pdf]

**Supplementary data to:**

**NEUROPROTECTIVE MECHANISM OF LOW-DOSE SODIUM  
NITRITE IN OXYGEN-GLUCOSE DEPRIVATION MODEL OF  
CEREBRAL ISCHEMIC STROKE IN PC12 CELLS**

Nader Shakib<sup>1</sup>, Mohammad Hassan Khadem Ansari<sup>1\*</sup>, Pouran Karimi<sup>2\*</sup>, Yousef Rasmi<sup>1</sup>

<sup>1</sup> Department of Biochemistry, Faculty of Medicine, Urmia University of Medical Sciences, Urmia, Iran

<sup>2</sup> Neurosciences Research Center (NSRC), Tabriz University of Medical Sciences, Tabriz, Iran

\* Corresponding authors: Dr. Mohammad Hassan Khadem Ansari, Department of Biochemistry, Faculty of Medicine, Urmia University of Medical Sciences, Urmia, Iran; E-mail: [ansari\\_mh@umsu.ac.ir](mailto:ansari_mh@umsu.ac.ir);  
Dr. Pouran Karimi, Neurosciences Research Center (NSRC), Tabriz University of Medical Sciences, Tabriz, Iran; E-mail: [karimip@tbzmed.ac.ir](mailto:karimip@tbzmed.ac.ir)

<http://dx.doi.org/10.17179/excli2018-1947>

This is an Open Access article distributed under the terms of the Creative Commons Attribution License (<http://creativecommons.org/licenses/by/4.0/>).

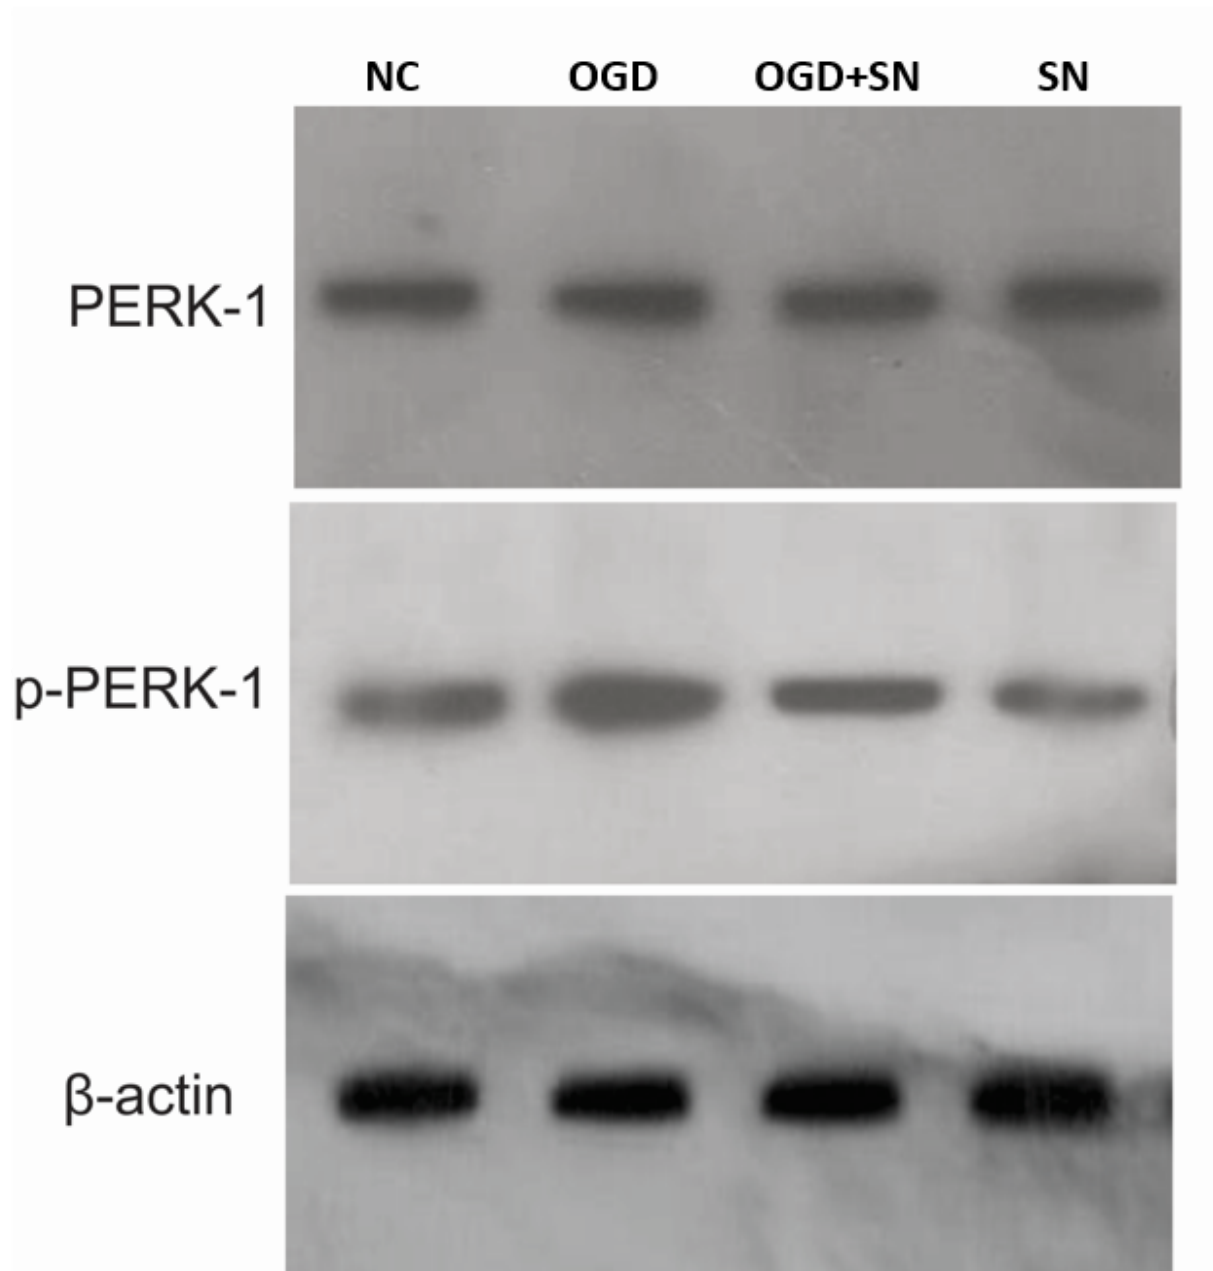

**Figure 1:** Immunoblotting images of expression of p-PERK, PERK, ATF6, CHOP, and  $\beta$ -actin proteins in three independent tests

NC: normal control; OGD: oxygen and glucose deprivation (4 h); OGD-SN: oxygen and glucose deprivation (4 h) co-treated with SN (100  $\mu$ m); SN: sodium nitrite (100  $\mu$ m) treated

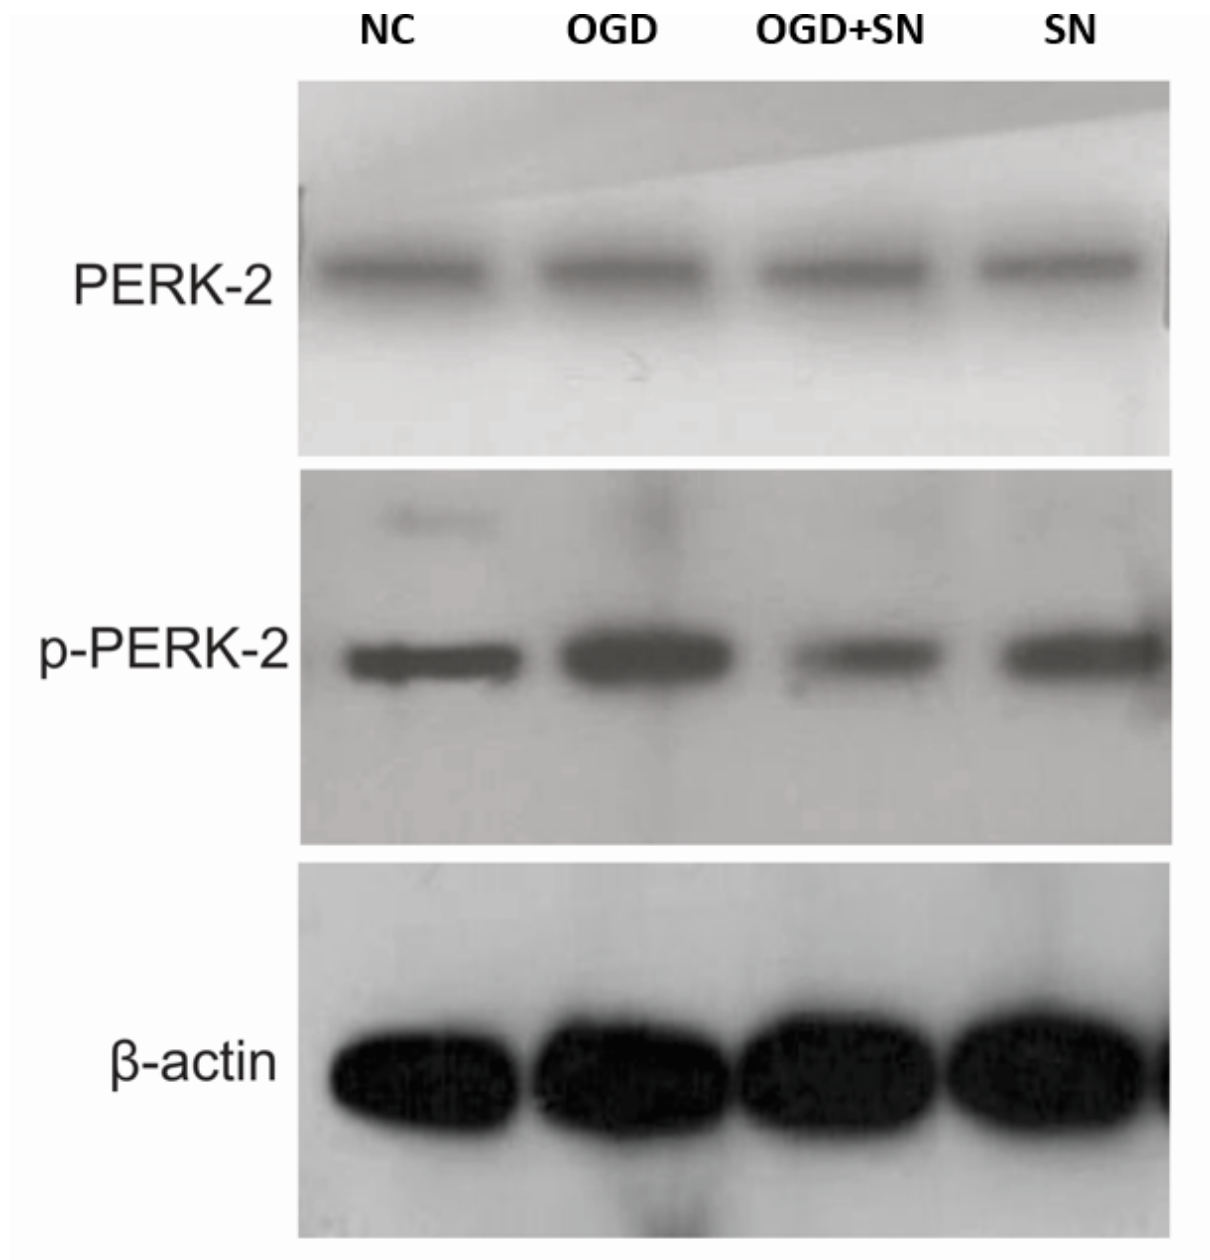

**Figure 1 (cont.):** Immunoblotting images of expression of p-PERK, PERK, ATF6, CHOP, and  $\beta$ -actin proteins in three independent tests

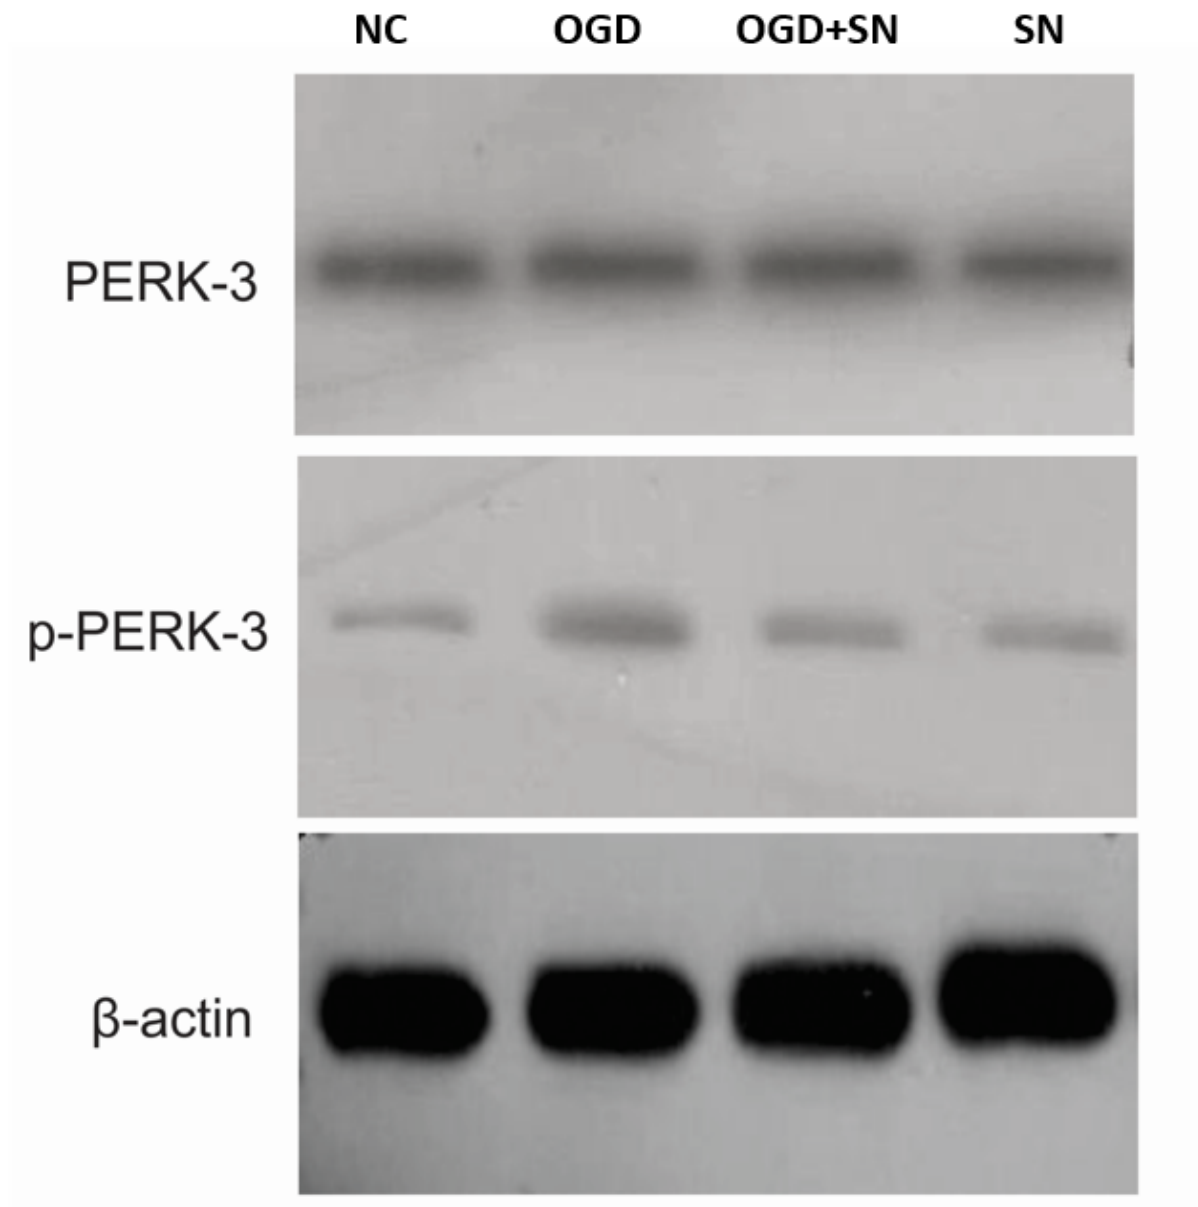

**Figure 1 (cont.):** Immunoblotting images of expression of p-PERK, PERK, ATF6, CHOP, and β-actin proteins in three independent tests

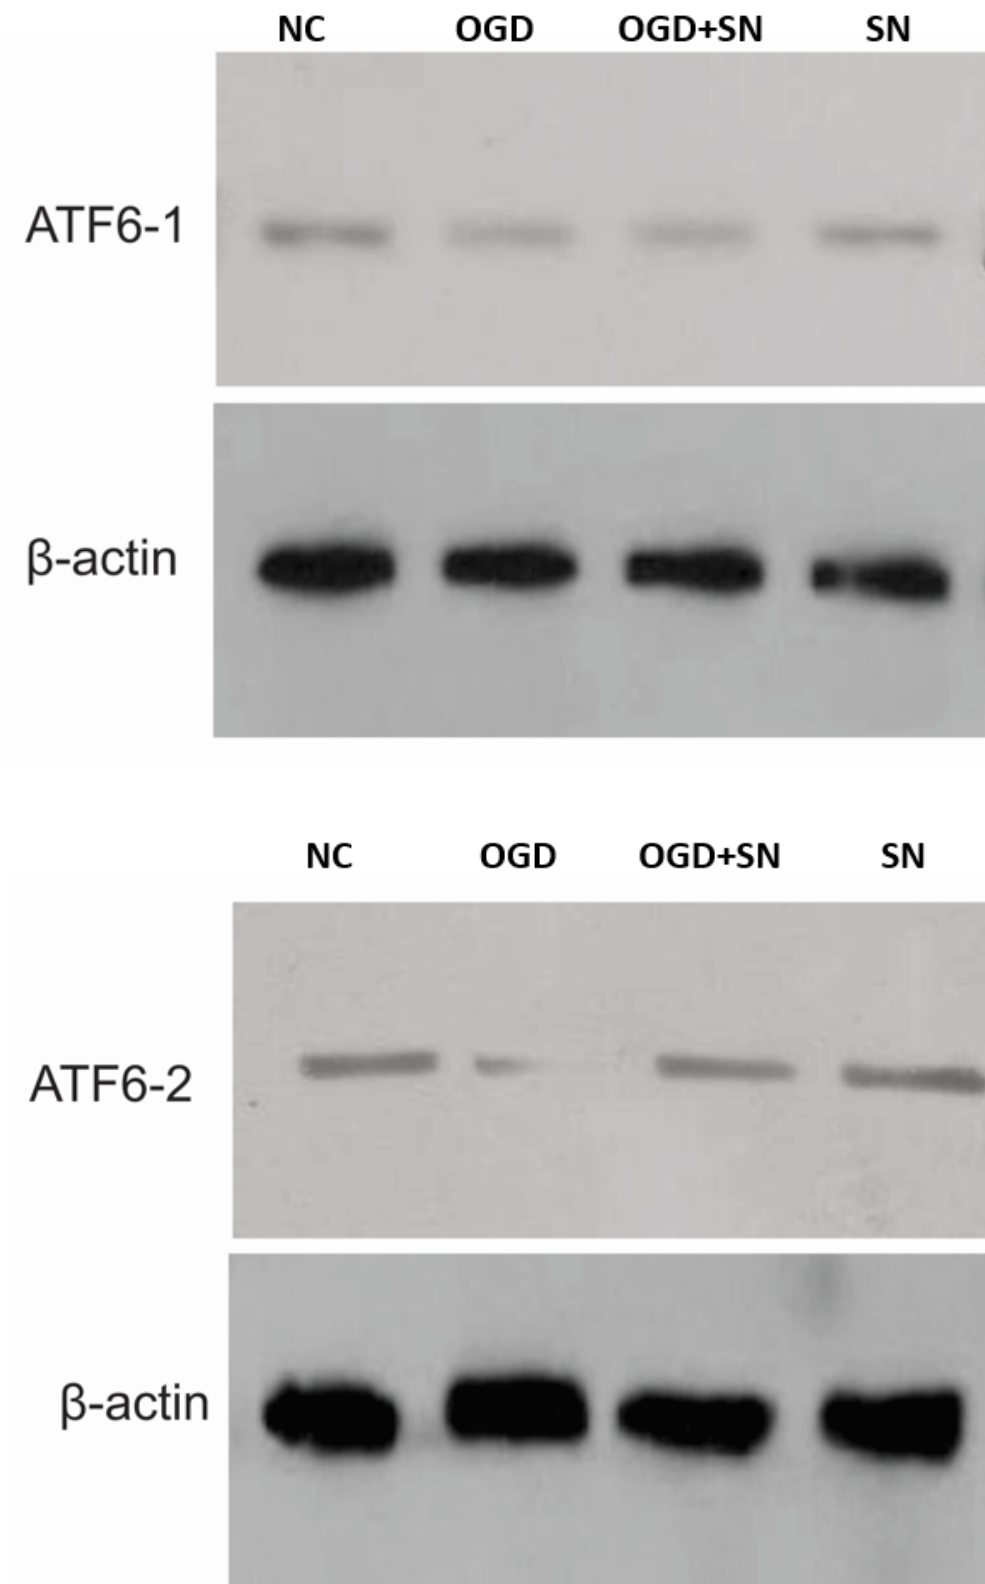

**Figure 1 (cont.):** Immunoblotting images of expression of p-PERK, PERK, ATF6, CHOP, and  $\beta$ -actin proteins in three independent tests

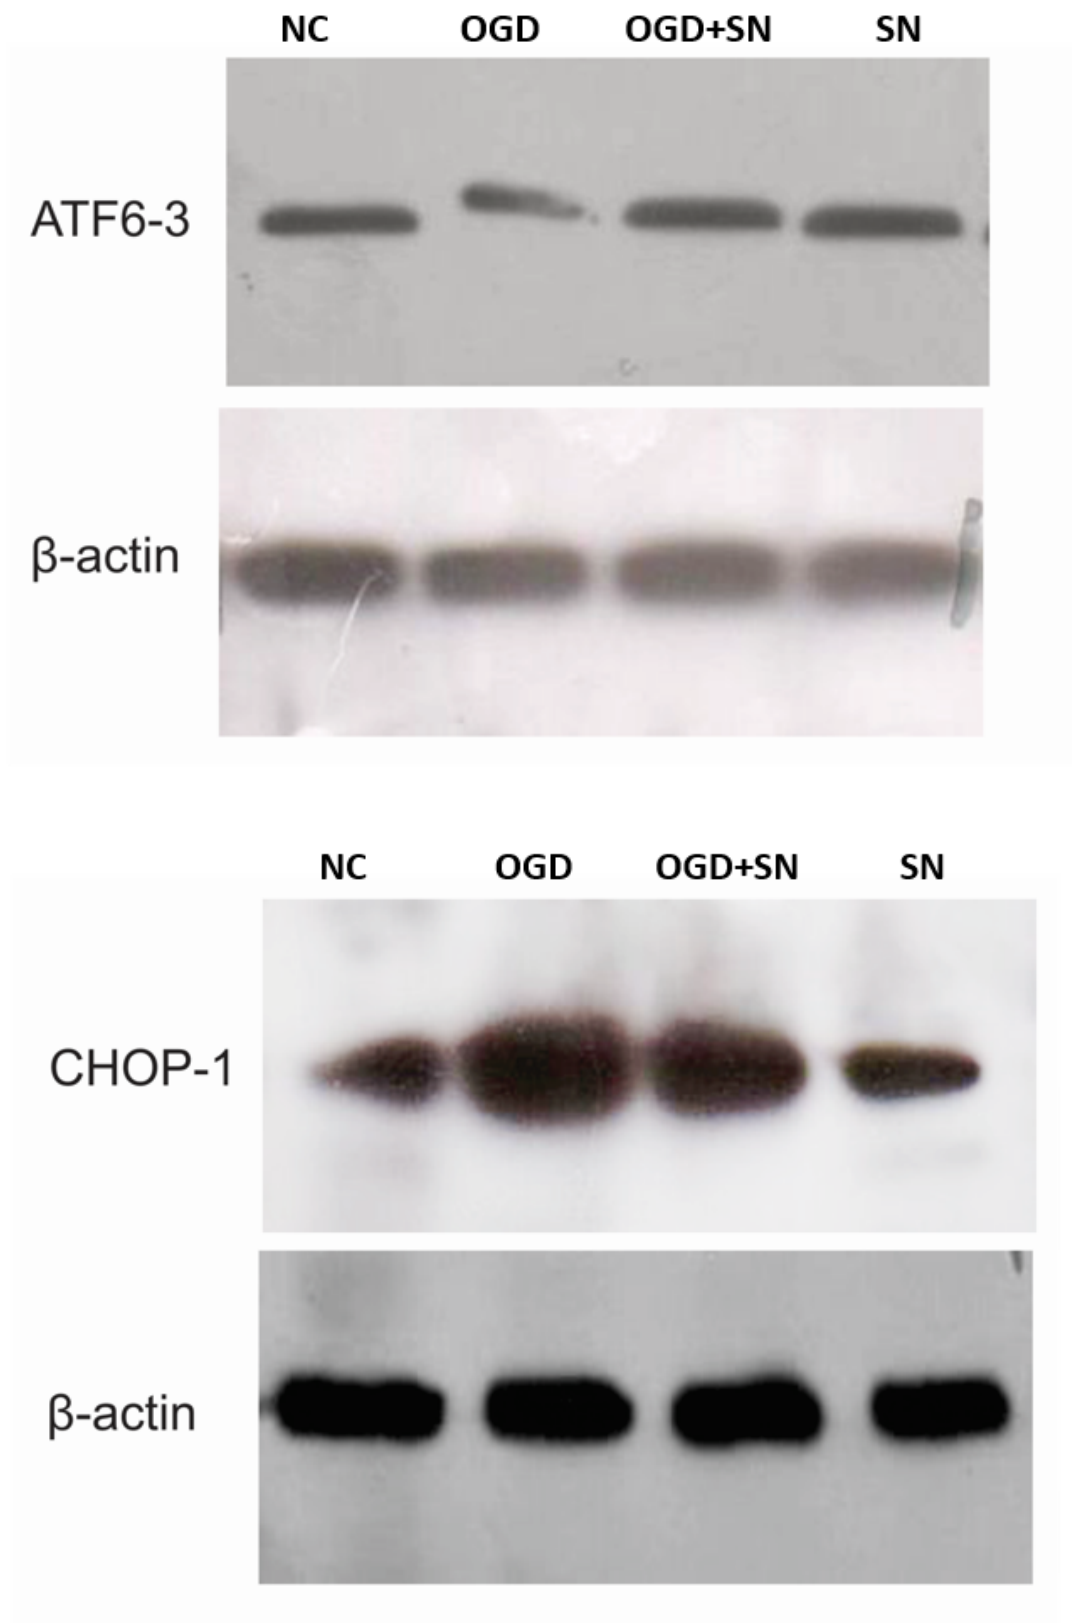

**Figure 1 (cont.):** Immunoblotting images of expression of p-PERK, PERK, ATF6, CHOP, and β-actin proteins in three independent tests

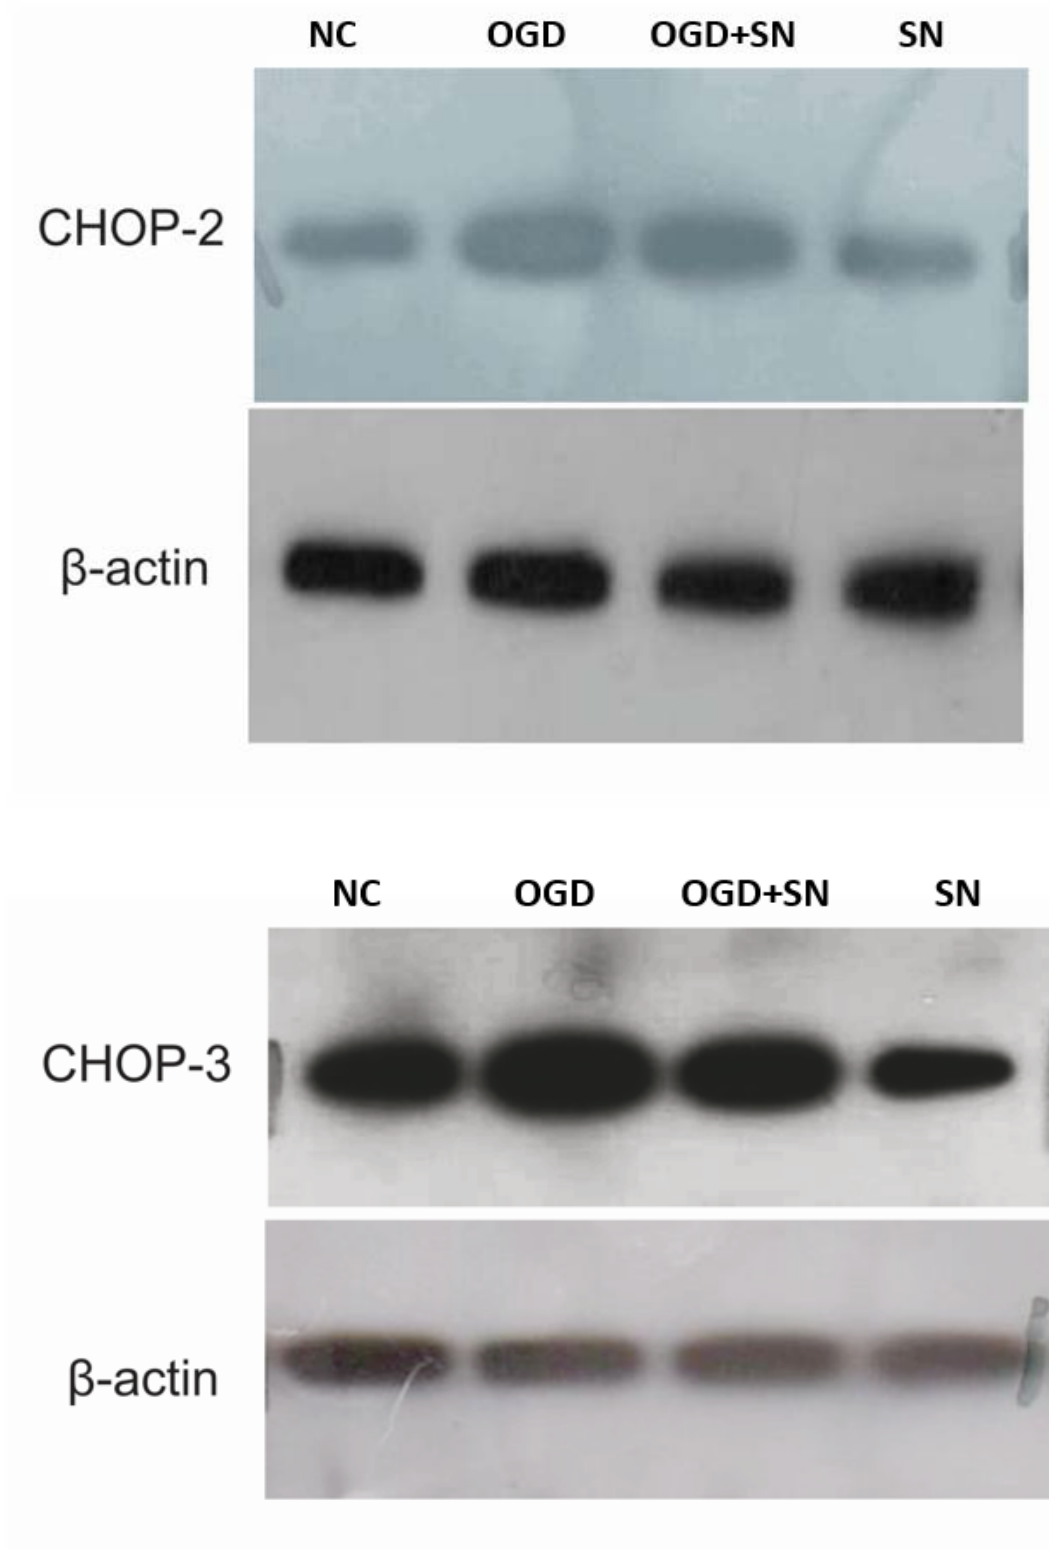

**Figure 1 (cont.):** Immunoblotting images of expression of p-PERK, PERK, ATF6, CHOP, and  $\beta$ -actin proteins in three independent tests

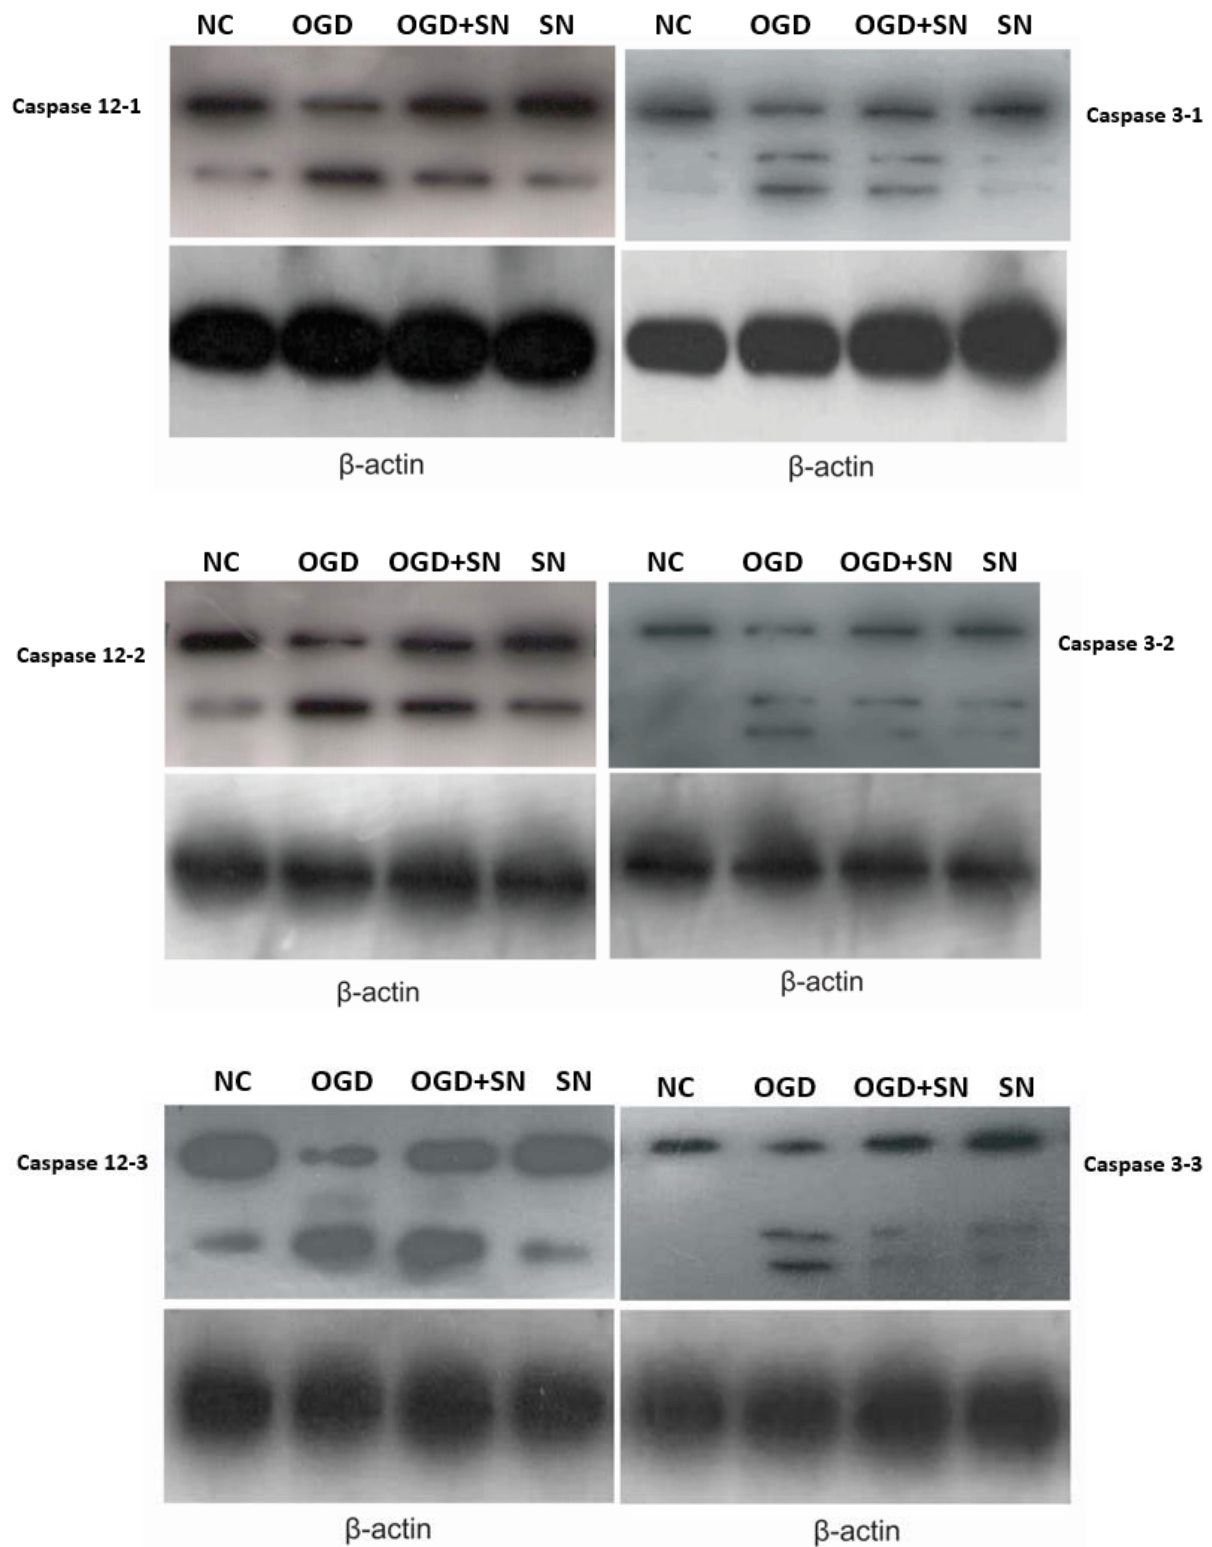

**Figure 2:** Immunoblotting images of caspase-12, caspase-3, and  $\beta$ -actin in three independent tests

NC: normal control; OGD: oxygen and glucose deprivation (4 h); OGD-SN: oxygen and glucose deprivation (4 h) co-treated with SN (100  $\mu$ m); SN: sodium nitrite (100  $\mu$ m) treated
